# Supplementary material for: Resistance to Gemcitabine in Pancreatic Cancer Is Connected to Methylglyoxal Stress and Heat Shock Response
Source: MDPI journal article supplement (doi:10.3390/cells12101414), 2023-05-17
Supplement: s1 [file s1]

Supplementary

1

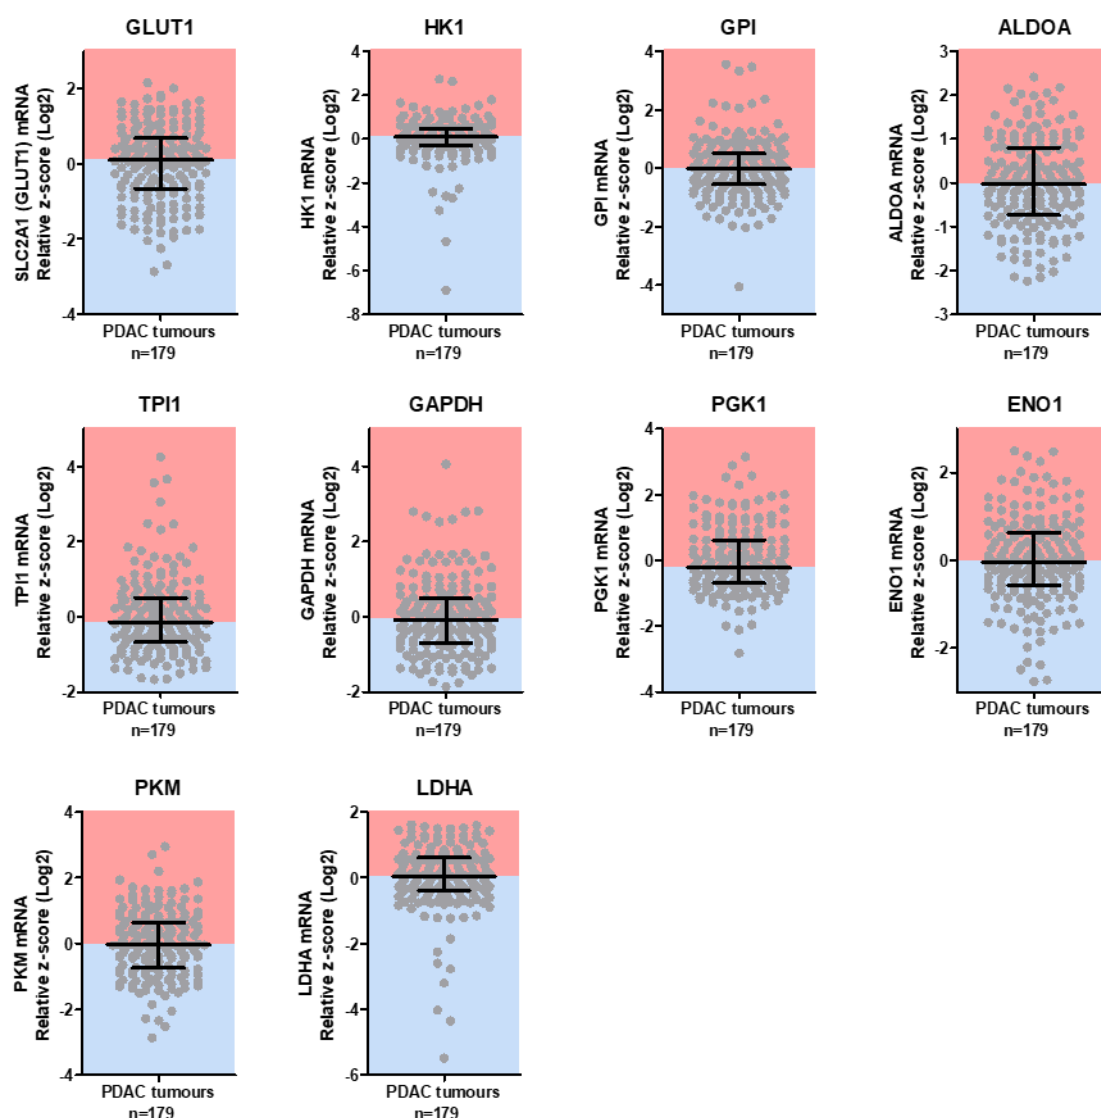

**Figure S1.** Gene expression of glycolysis enzymes (GLUT1, HK1, G6PD, ALDOA, TPI1, GAPDH, PGK1, ENO1, PKM and LDHA) split into high (red shading) and low (blue shading) based on median, for n=179 PDAC tumors (TCGA data).

2

3

4

5

6

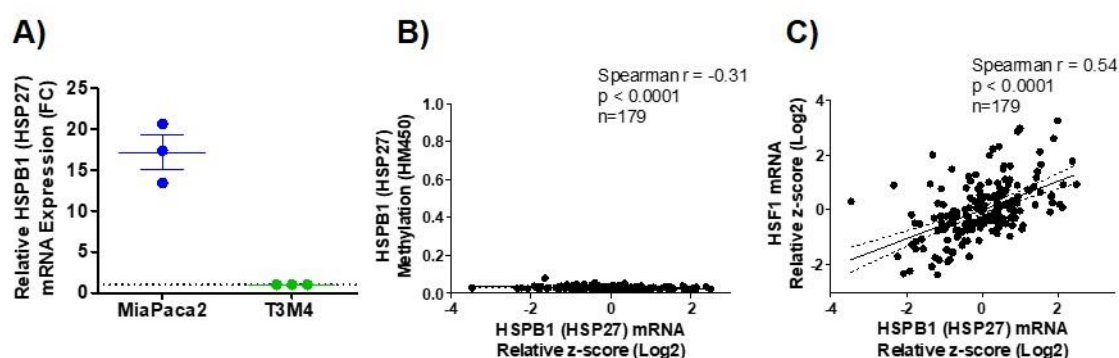

**Figure S2.** (A) mRNA levels of HSP27 (*HSPB1*) assessed by RT-qPCR in parental T3M4 and MiaPaca2 cells. mRNA levels are shown as relative to parental T3M4 cells and data were analyzed using paired t-test and shown as mean values  $\pm$  SEM of three independent experiments;  $*p < 0.05$ . Correlation between HSP27 (*HSPB1*) mRNA levels and (B) HSP27 (*HSPB1*) gene methylation (HM450) and (C) *HSF1* mRNA levels across  $n=179$  PDAC tumors (TCGA data). Data were analyzed by linear regression; statistical significance indicated.

**Table S1.** List of antibodies.

| Antibody       | Concentration | Company            | Identifier         |
|----------------|---------------|--------------------|--------------------|
| ArgP           | 1 in 10,000   | Oya et al. 1999    | Cat# mAb6B         |
| $\beta$ -actin | 1 in 5,000    | Sigma-Aldrich      | Cat# A5441         |
| GLO1           | 1 in 1,000    | BioMAC             | Cat# 02-14         |
| GLUT1          | 1 in 1,000    | Cell Signaling     | Cat# 12939         |
| HSF1           | 1 in 1,000    | Cell Signaling     | Cat# 12972         |
| HSP27          | 1 in 3,000    | Enzo Life Sciences | Cat# ADI-SPA-803-D |
| HSP90          | 1 in 1,000    | Cell Signaling     | Cat# 4877          |
| LDHA           | 1 in 1,000    | Cell Signaling     | Cat# 3582          |
| MGHs           | 1 in 1,000    | Cell Biolabs       | Cat# STA-011       |

**Table S2.** Oncogenic mutations investigated in parental and gemcitabine resistant cells.

27

| Gene     | Variant                     | Classification  | Exon     | Consequence        | External IDs | Cell lines |    |          |    |
|----------|-----------------------------|-----------------|----------|--------------------|--------------|------------|----|----------|----|
|          |                             |                 |          |                    |              | T3M4       |    | MiaPaca2 |    |
|          |                             |                 |          |                    |              | P          | GR | P        | GR |
| ALK      | c.4587C>G<br>(p.Asp1529Glu) | Benign          | 29 of 29 | Missense Variant   | rs1881421    | +          | +  | +        | +  |
| ALK      | c.4472A>G<br>(p.Lys1491Arg) | Benign          | 29 of 29 | Missense Variant   | rs1881420    | +          | +  | +        | +  |
| ALK      | c.4381A>G<br>(p.Ile1461Val) | Benign          | 29 of 29 | Missense Variant   | rs1670283    | +          | +  | +        | +  |
| ALK      | c.3375C>A                   | Benign          | 21 of 29 | Synonymous Variant | rs3795850    | +          | +  | +        | +  |
| PDGFRA   | c.1701A>G                   | Benign          | 12 of 23 | Synonymous Variant | rs1873778    | +          | +  | +        | +  |
| PDGFRA   | c.2472C>T                   | Benign          | 18 of 23 | Synonymous Variant | rs2228230    | +          | +  | -        | -  |
| MET      | c.3912C>T                   | Benign          | 20 of 21 | Synonymous Variant | rs41736      | +          | +  | -        | -  |
| MET      | c.534C>T                    | Benign          | 2 of 21  | Synonymous Variant | rs35775721   | -          | -  | +        | +  |
| HRAS     | c.81T>C                     | Benign          | 2 of 6   | Synonymous Variant | rs12628      | +          | +  | +        | +  |
| DDR2     | c.1260C>G                   | Probably Benign | 12 of 19 | Synonymous Variant | rs2298258    | +          | +  | -        | -  |
| FGFR3    | c.1959G>A                   | Probably Benign | 14 of 18 | Synonymous Variant | rs7688609    | +          | +  | +        | +  |
| KIT      | c.1621A>C<br>(p.Met541Leu)  | Probably Benign | 10 of 21 | Missense Variant   | rs3822214    | +          | +  | -        | -  |
| KIT      | c.2586G>C                   | Probably Benign | 18 of 21 | Synonymous Variant | rs3733542    | +          | +  | -        | -  |
| HIST1H3B | c.*10C>T                    | Probably Benign | 1 of 1   | 3' UTR Variant     | rs2213284    | +          | +  | -        | -  |
| EGFR     | c.2361G>A                   | Probably Benign | 20 of 28 | Synonymous Variant | rs1050171    | -          | -  | +        | +  |
| KRAS     | c.183A>C<br>(p.Gln61His)    | Pathogenic      | 3 of 6   | Missense Variant   | rs17851045   | +          | +  | -        | -  |
| KRAS     | c.34G>T<br>(p.Gly12Cys)     | Pathogenic      | 2 of 6   | Missense Variant   | rs121913530  | -          | -  | +        | +  |

+ Mutation is present; - Mutation is not present; P= parental; GR= gemcitabine resistant. Additional oncogenes investigated, no mutations evidenced: AKT1, BRAF, CDKN2A, CTNNB1, ERBB2, ERBB4, FGFR2, H3F3A, IDH1, IDH2, MAP2K1, NRAS, PIK3CA, PIK3R1, PTEN, STK11.

28

29

30
